# Supplementary figures and images for: Anti-nociceptive action of peripheral mu-opioid receptors by G-beta-gamma protein-mediated inhibition of TRPM3 channels
Source: eLife journal article supplement (doi:10.7554/elife.26280), 2017-08-15

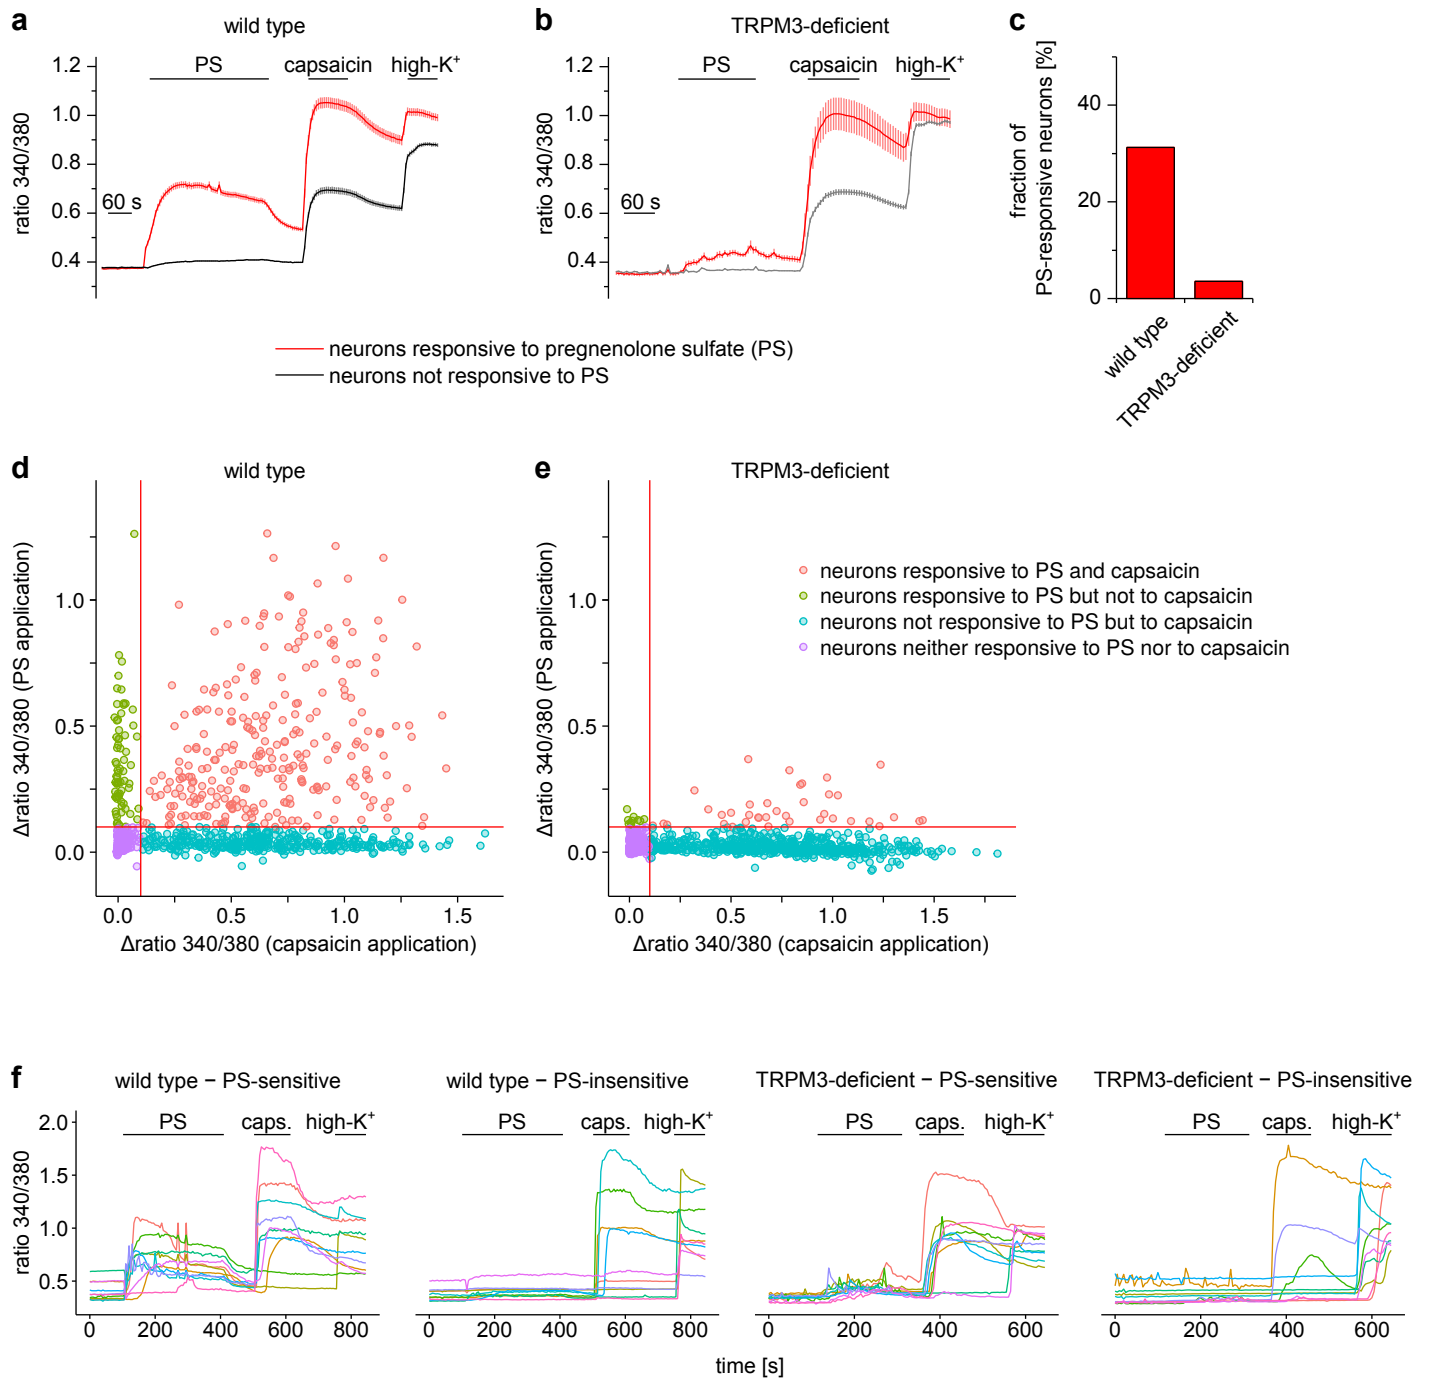

Figure 1 - figure supplement 1

Supplement: supp [file elife_poa_e26280_Figure_1_Figure_Supplement_1.pdf › elife_poa_e26280_Figure_1_Figure_Supplement_1.pdf]

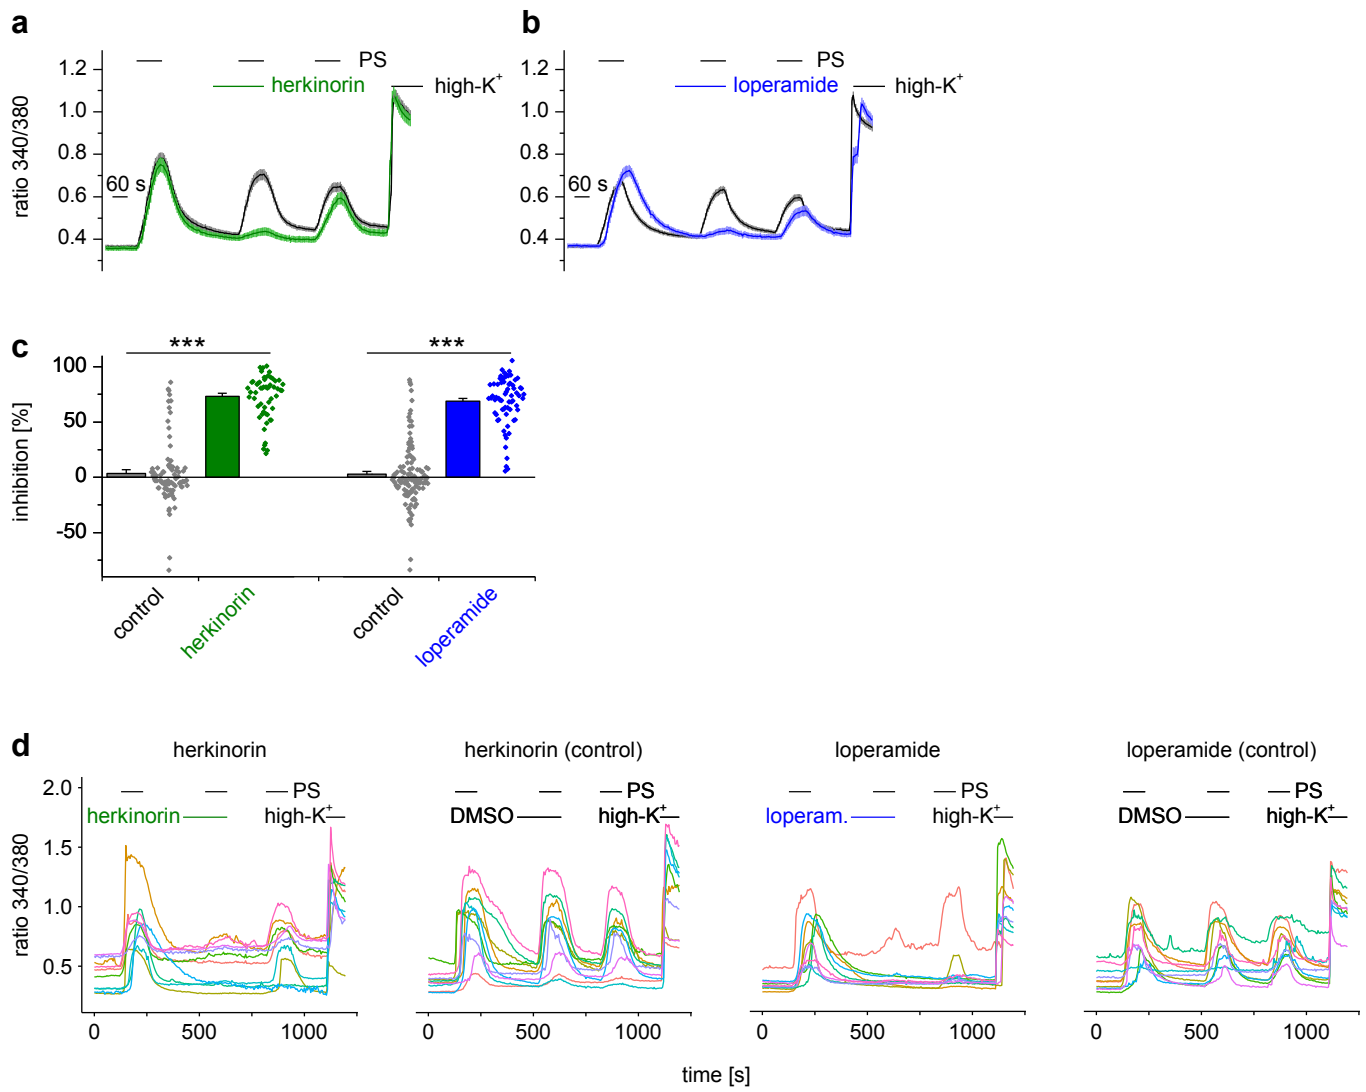

Figure 1 - figure supplement 2

Supplement: supp [file elife_poa_e26280_Figure_1_Figure_Supplement_2.pdf › elife_poa_e26280_Figure_1_Figure_Supplement_2.pdf]

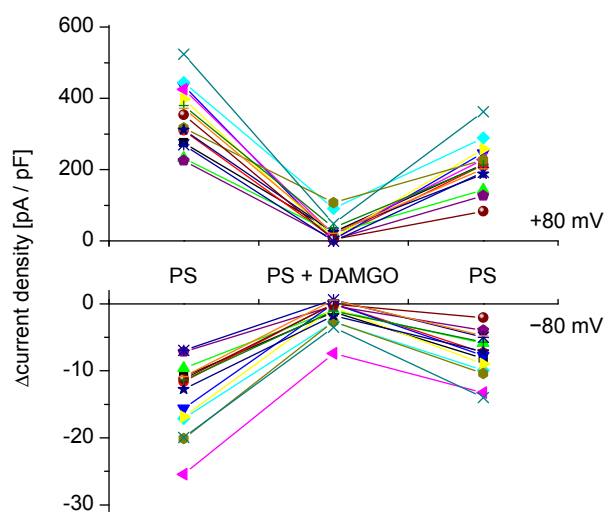

Figure 1 - figure supplement 3

Supplement: supp [file elife_poa_e26280_Figure_1_Figure_Supplement_3.pdf › elife_poa_e26280_Figure_1_Figure_Supplement_3.pdf]

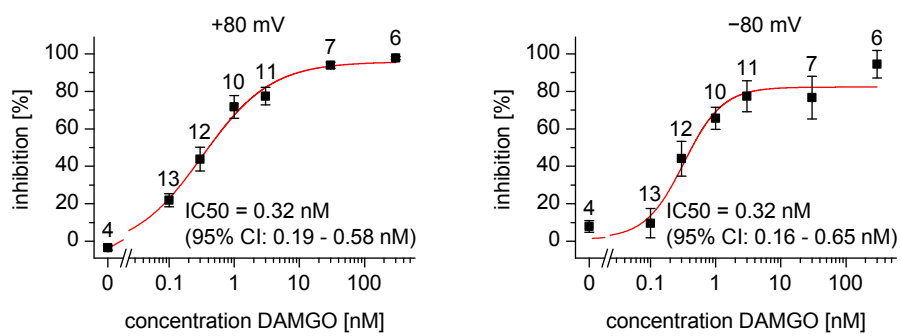

Figure 1 - figure supplement 4

Supplement: supp [file elife_poa_e26280_Figure_1_Figure_Supplement_4.pdf › elife_poa_e26280_Figure_1_Figure_Supplement_4.pdf]

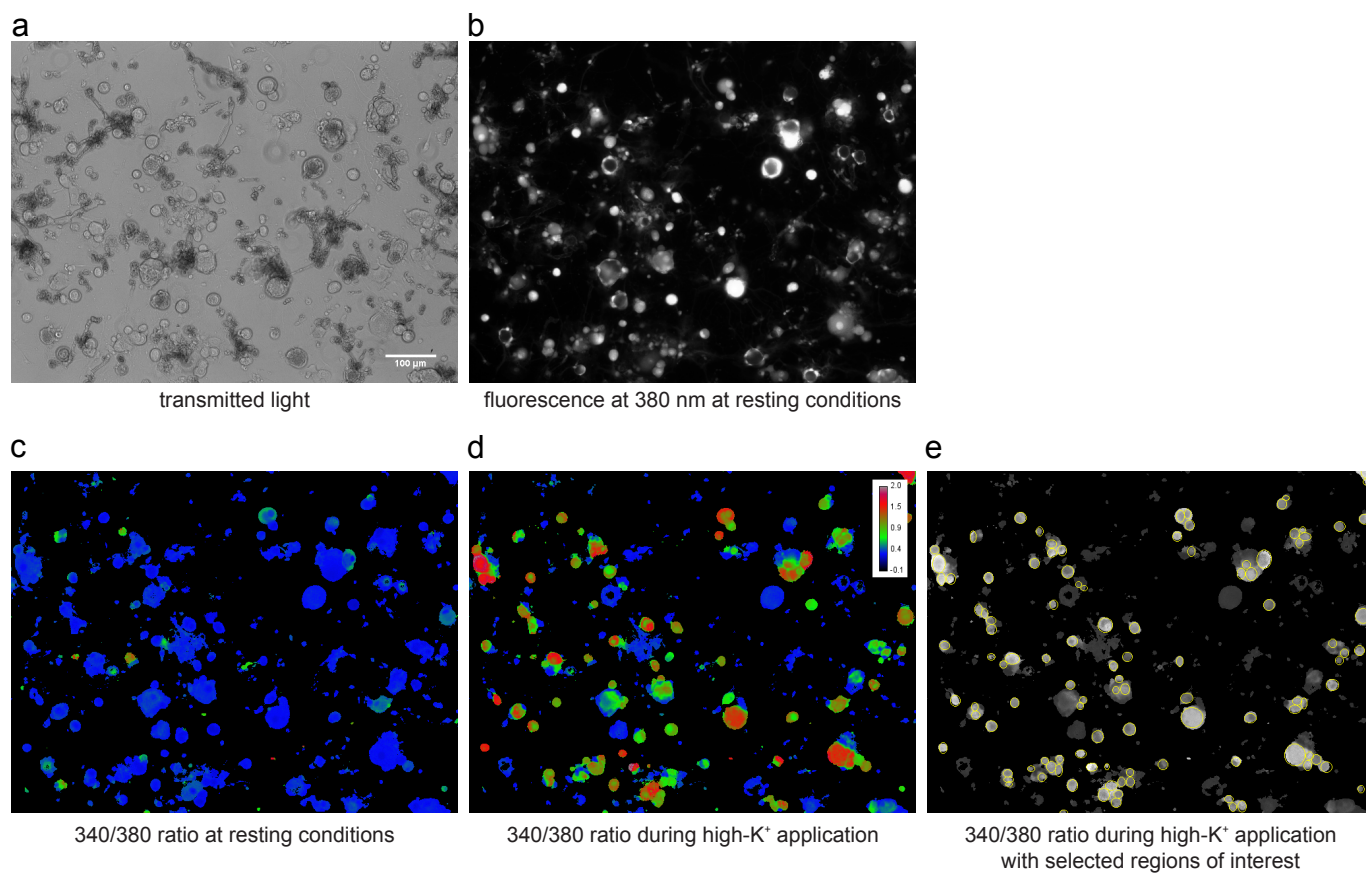

Figure 1 - figure supplement 5

Supplement: supp [file elife_poa_e26280_Figure_1_Figure_Supplement_5.pdf › elife_poa_e26280_Figure_1_Figure_Supplement_5.pdf]

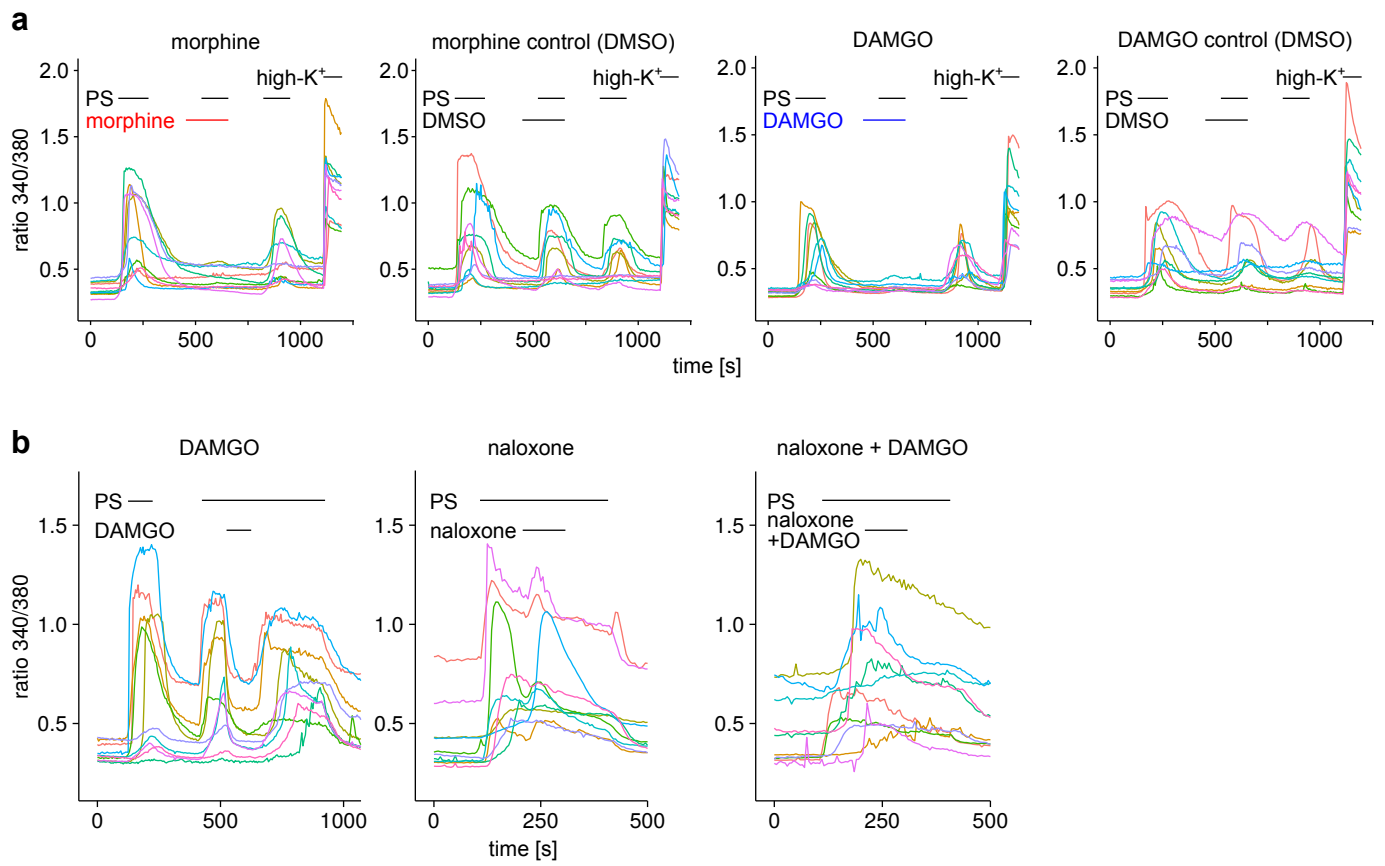

Figure 1 - figure supplement 6

Supplement: supp [file elife_poa_e26280_Figure_1_Figure_Supplement_6.pdf › elife_poa_e26280_Figure_1_Figure_Supplement_6.pdf]

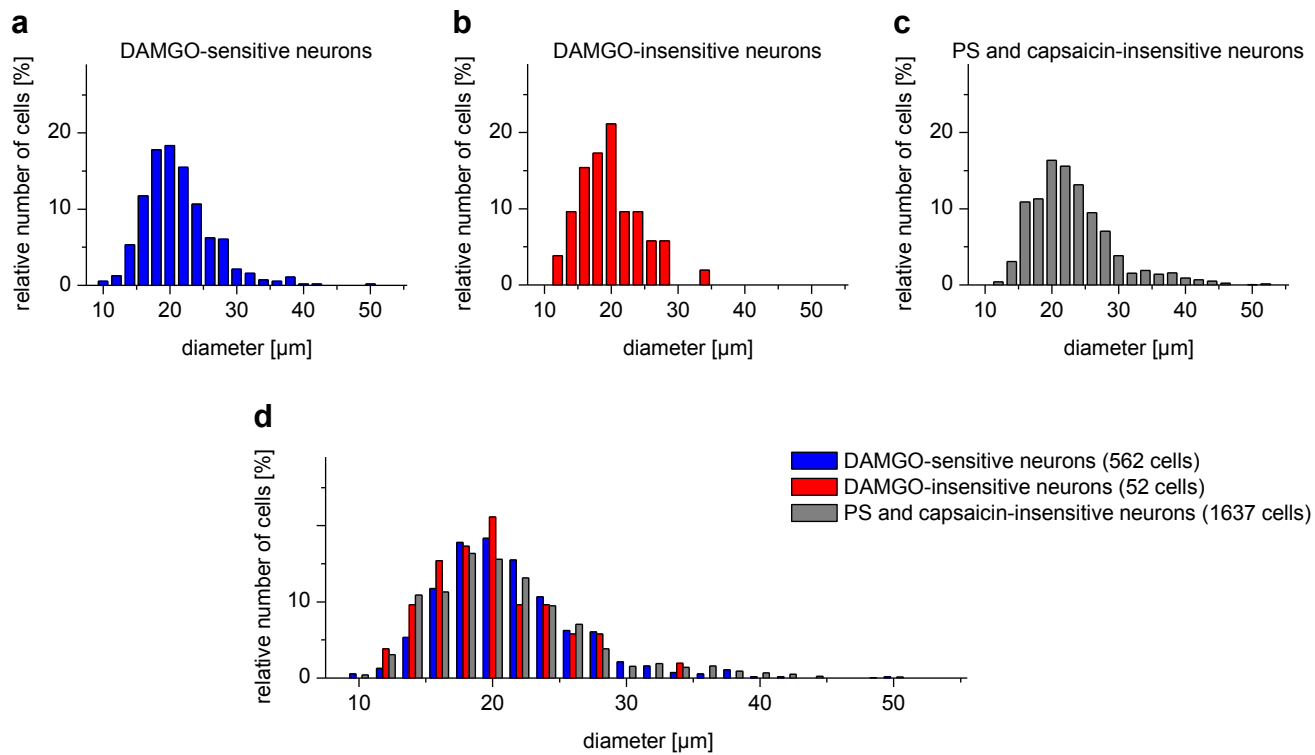

Figure 2 figure supplement 1

Supplement: supp [file elife_poa_e26280_Figure_2_Figure_Supplement_1.pdf › elife_poa_e26280_Figure_2_Figure_Supplement_1.pdf]

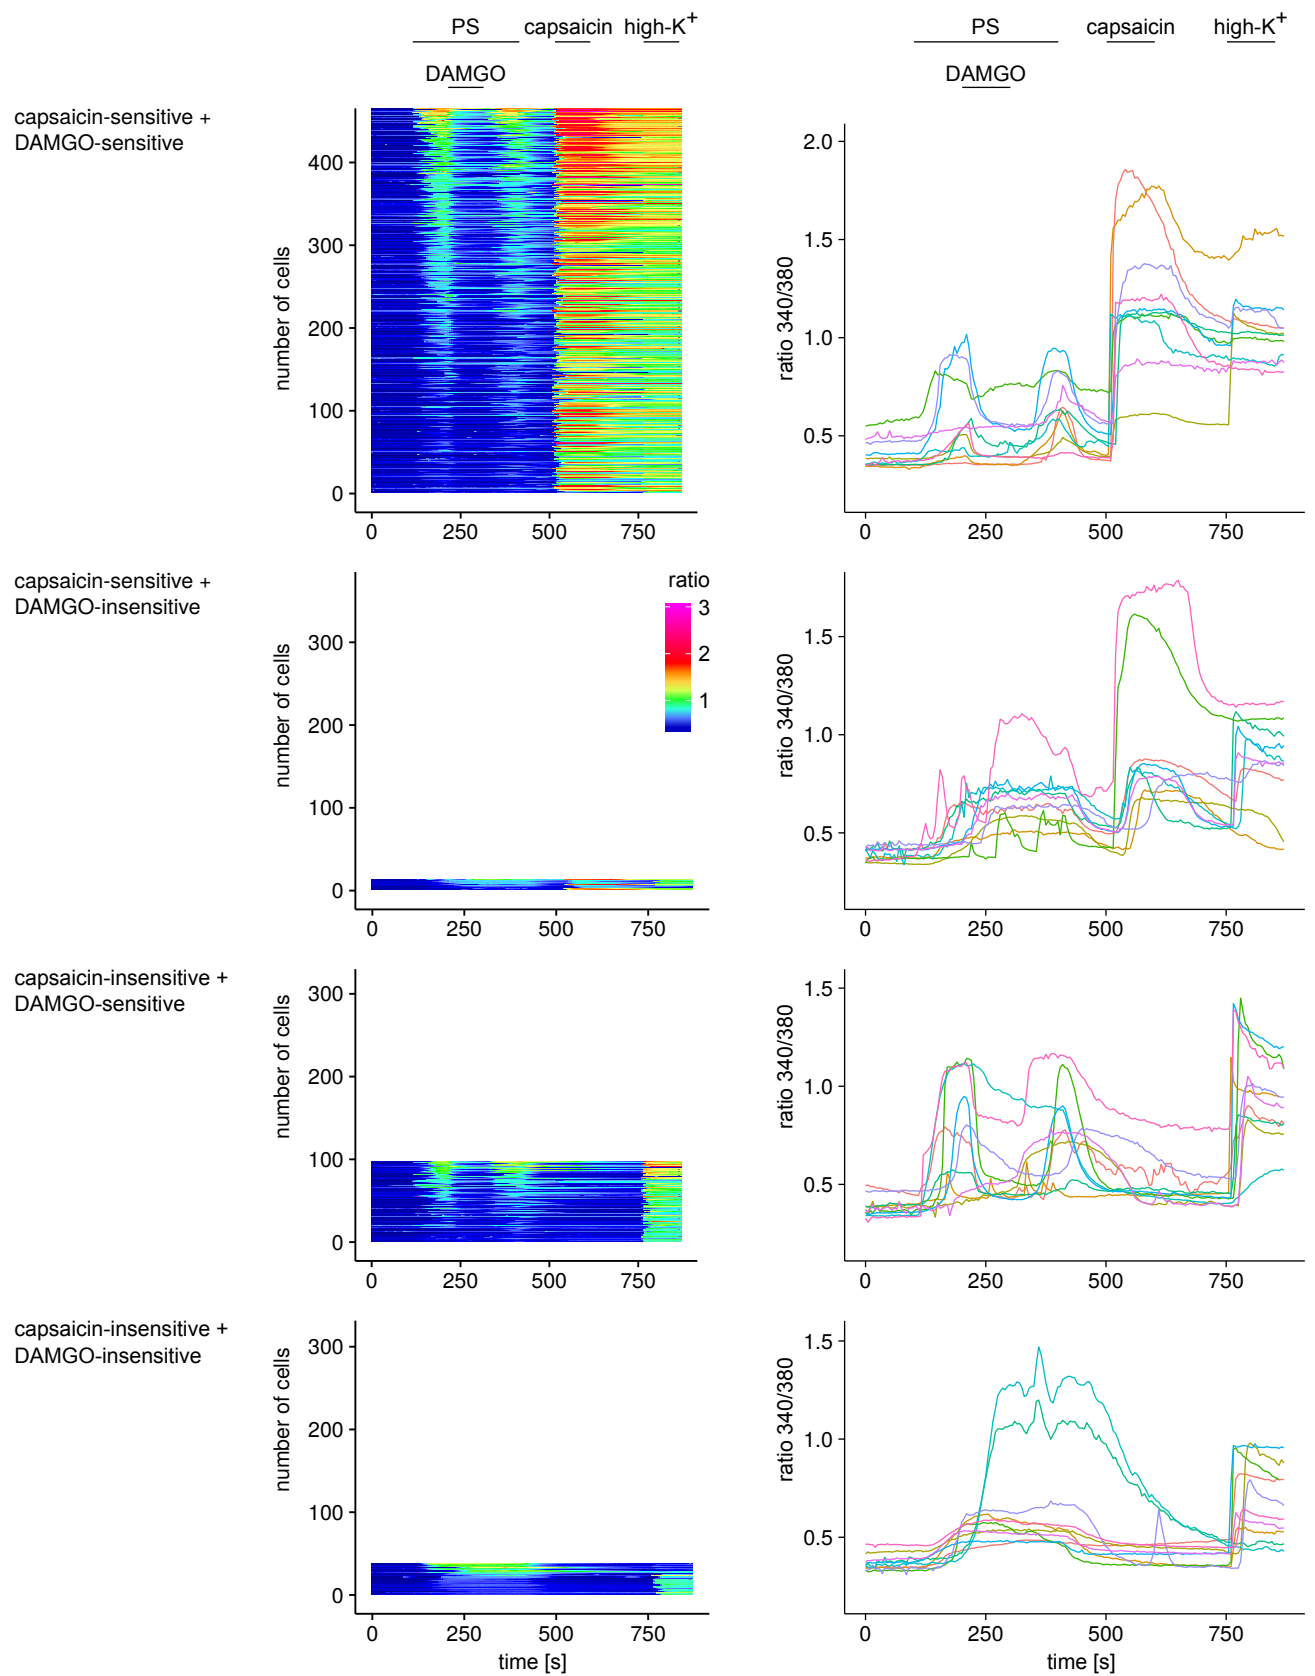

Figure 2 - figure supplement 2

Supplement: supp [file elife_poa_e26280_Figure_2_Figure_Supplement_2.pdf › elife_poa_e26280_Figure_2_Figure_Supplement_2.pdf]

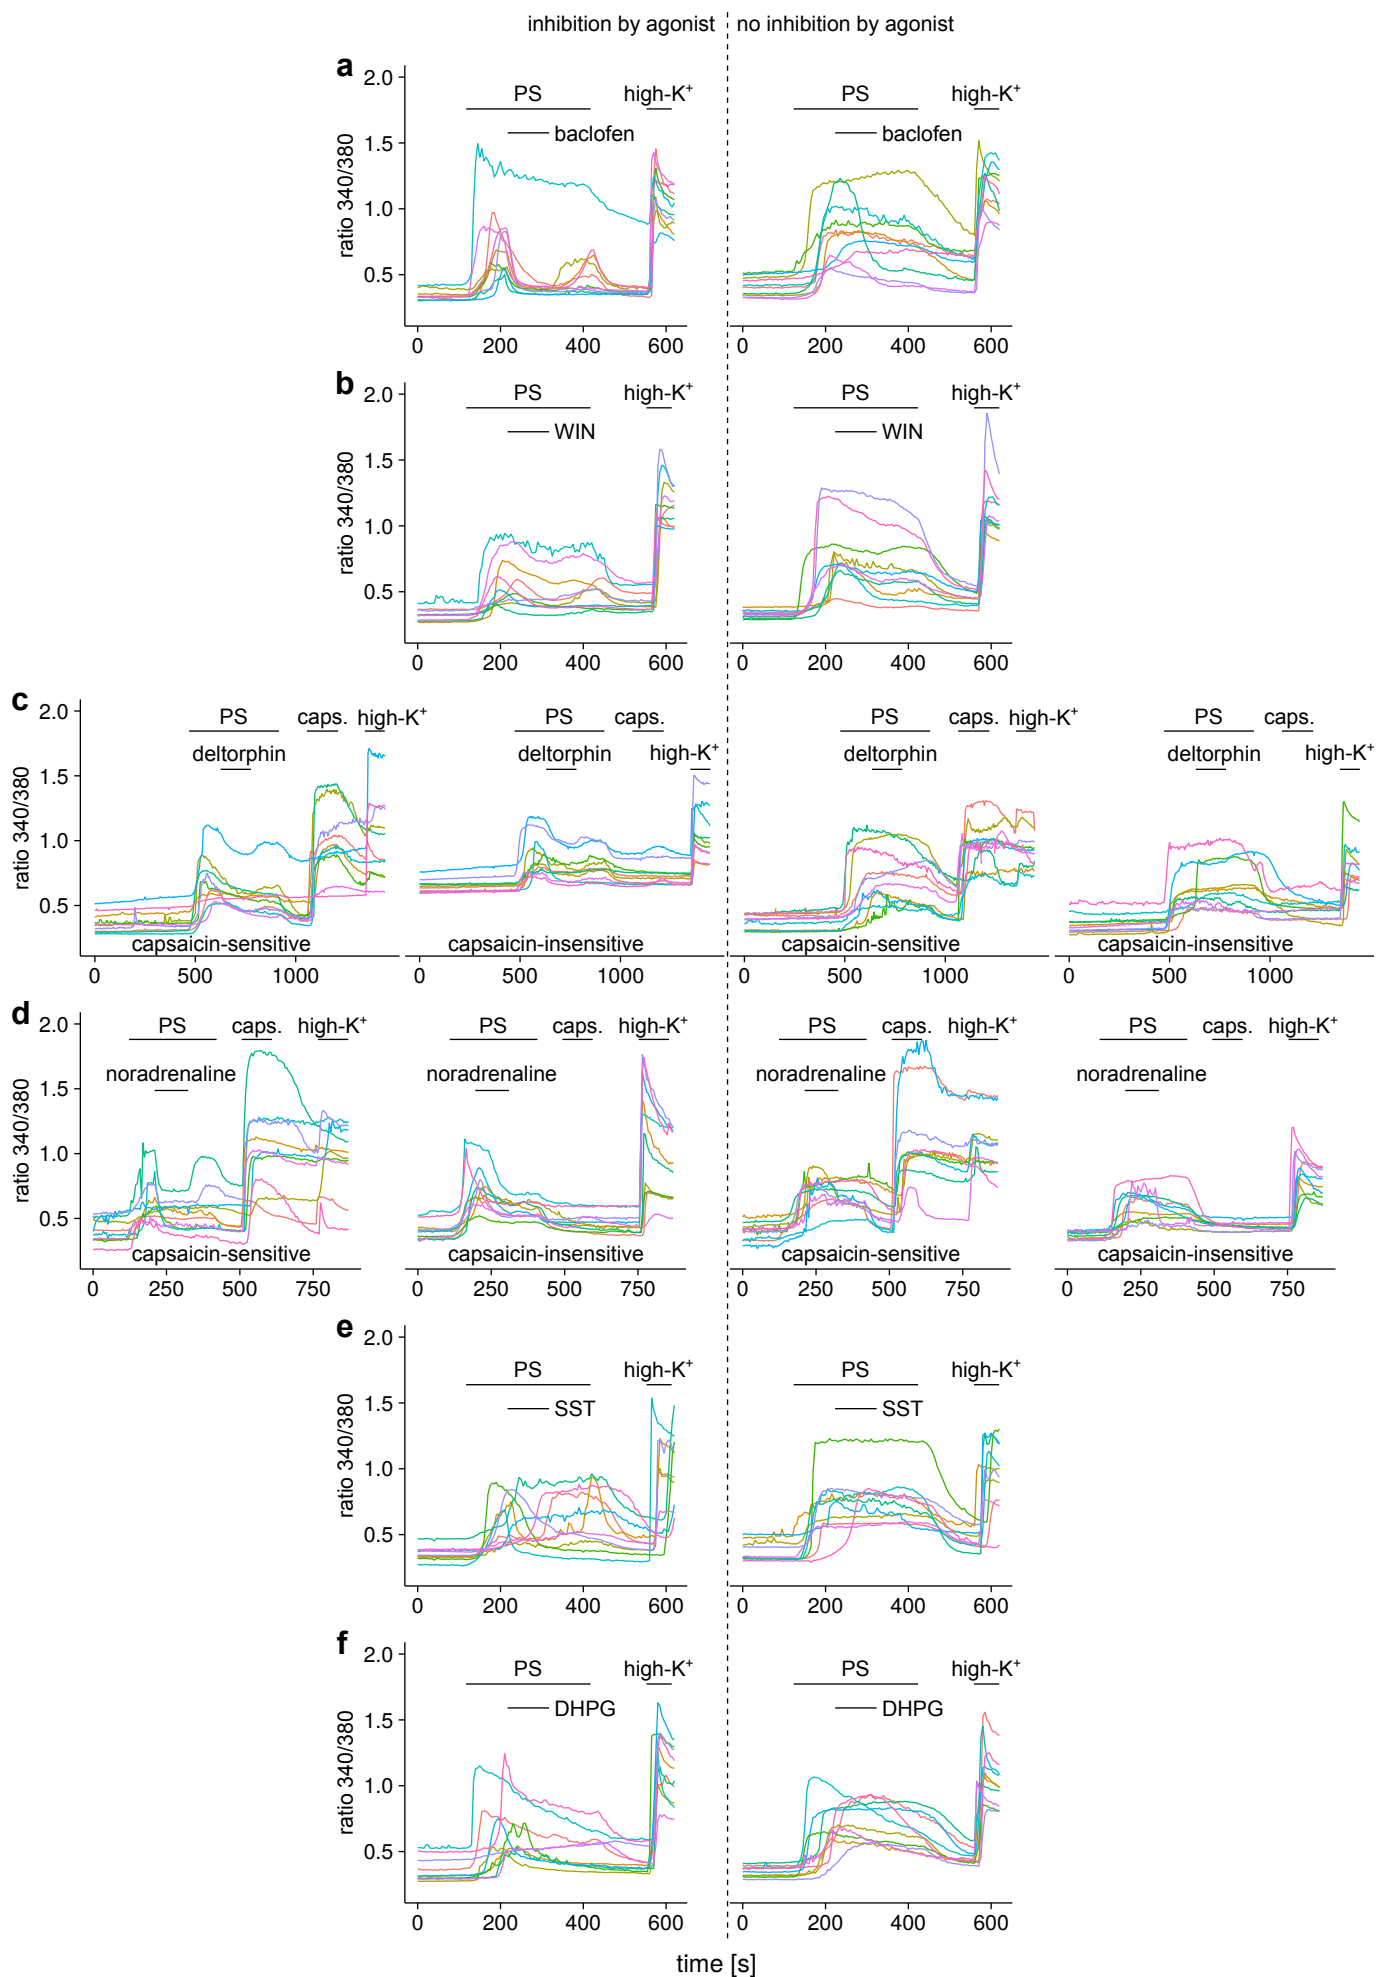

Figure 3 - figure supplement 1

Supplement: supp [file elife_poa_e26280_Figure_3_Figure_Supplement_1.pdf › elife_poa_e26280_Figure_3_Figure_Supplement_1.pdf]

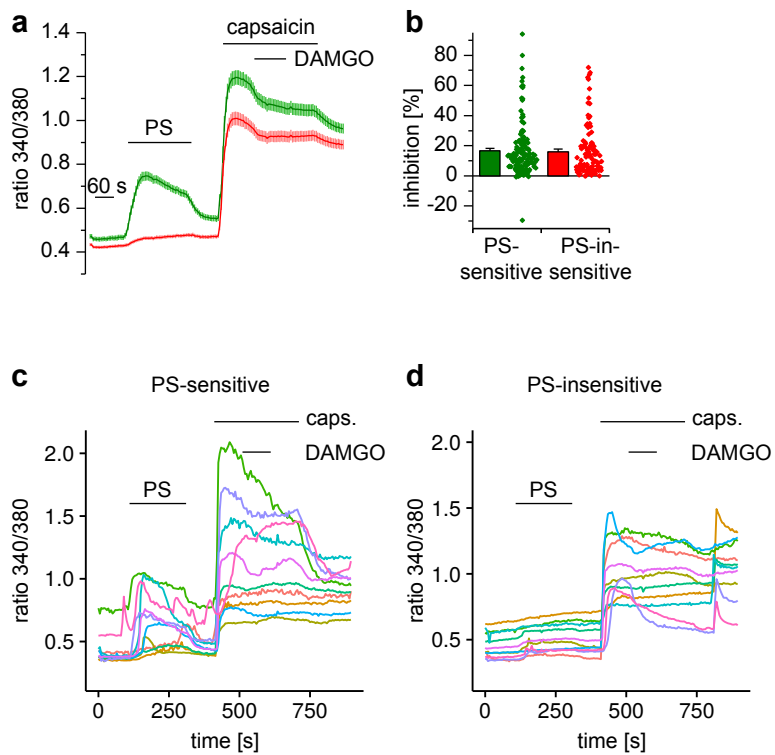

Figure 4 - figure supplement 1

Supplement: supp [file elife_poa_e26280_Figure_4_Figure_Supplement_1.pdf › elife_poa_e26280_Figure_4_Figure_Supplement_1.pdf]

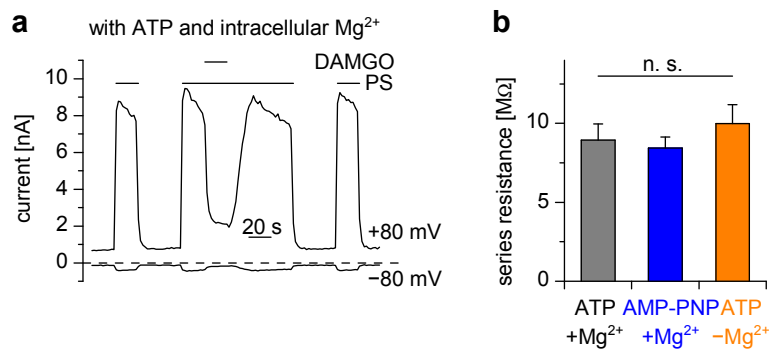

Figure 5 - figure supplement 1

Supplement: supp [file elife_poa_e26280_Figure_5_Figure_Supplement_1.pdf › elife_poa_e26280_Figure_5_Figure_Supplement_1.pdf]

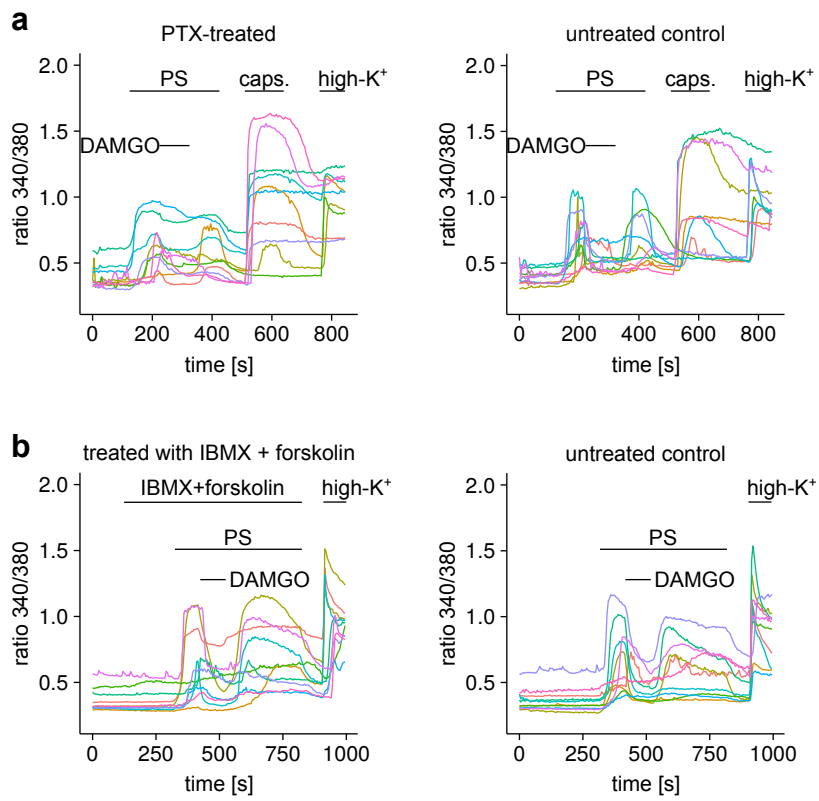

Figure 5 - figure supplement 2

Supplement: supp [file elife_poa_e26280_Figure_5_Figure_Supplement_2.pdf › elife_poa_e26280_Figure_5_Figure_Supplement_2.pdf]

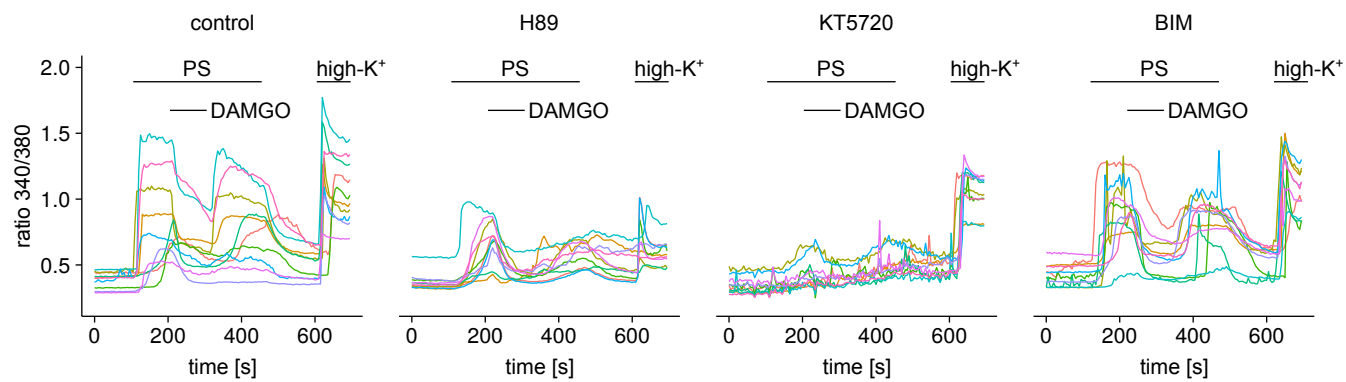

Figure 6 - figure supplement 1

Supplement: supp [file elife_poa_e26280_Figure_6_Figure_Supplement_1.pdf › elife_poa_e26280_Figure_6_Figure_Supplement_1.pdf]

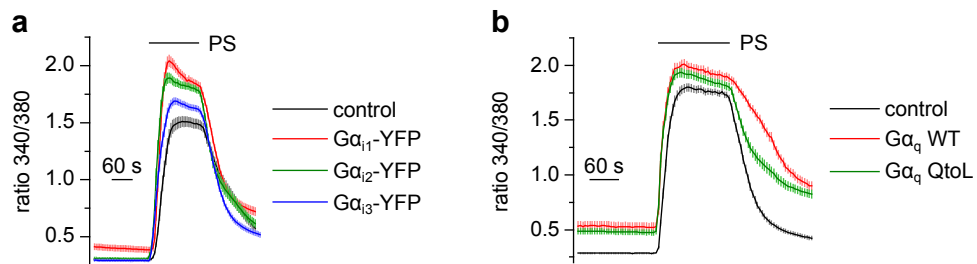

Figure 7 - figure supplement 1

Supplement: supp [file elife_poa_e26280_Figure_7_Figure_Supplement_1.pdf › elife_poa_e26280_Figure_7_Figure_Supplement_1.pdf]

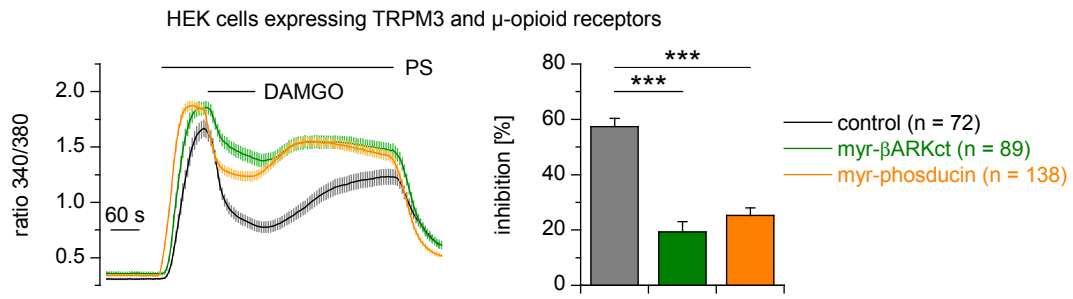

Figure 7 - figure supplement 2

Supplement: supp [file elife_poa_e26280_Figure_7_Figure_Supplement_2.pdf › elife_poa_e26280_Figure_7_Figure_Supplement_2.pdf]

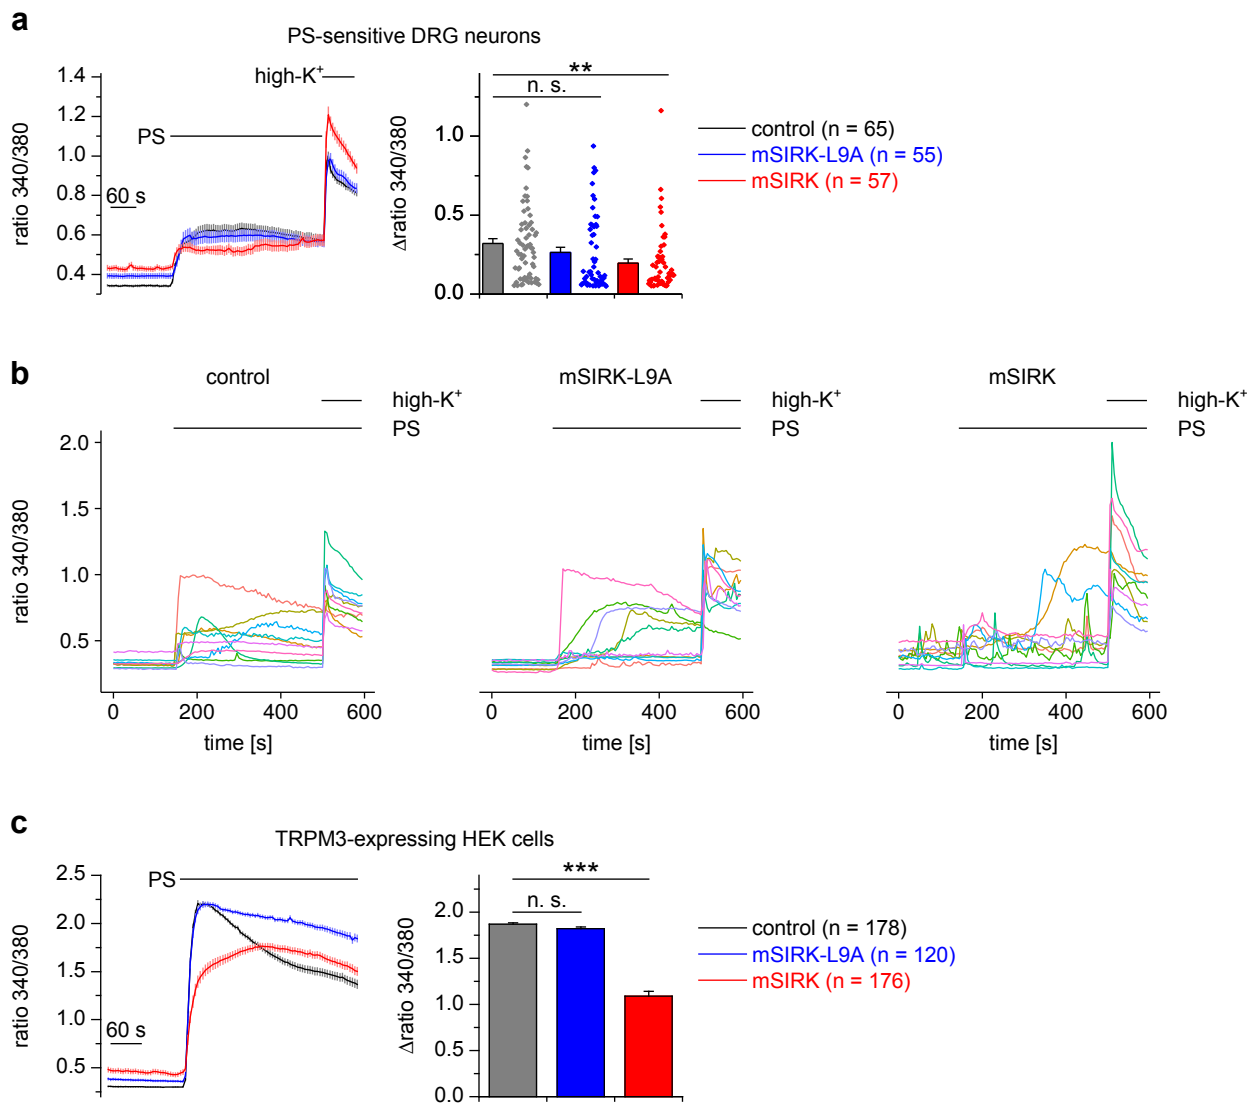

Figure 7 - figure supplement 3

Supplement: supp [file elife_poa_e26280_Figure_7_Figure_Supplement_3.pdf › elife_poa_e26280_Figure_7_Figure_Supplement_3.pdf]

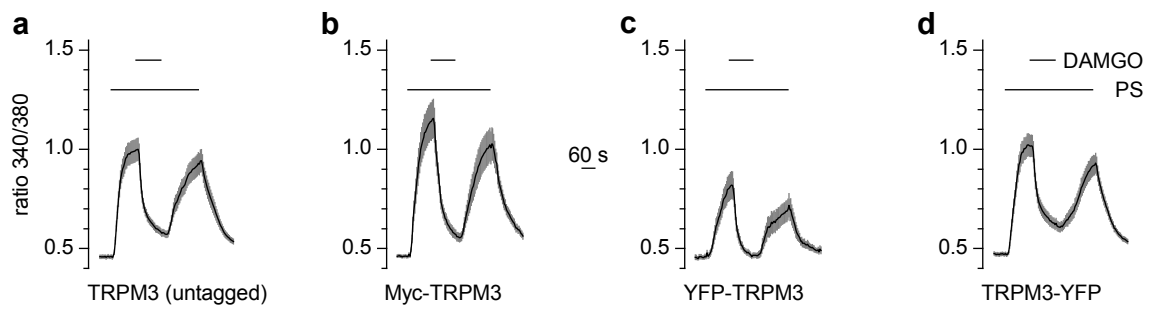

Figure 8 - figure supplement 1

Supplement: supp [file elife_poa_e26280_Figure_8_Figure_Supplement_1.pdf › elife_poa_e26280_Figure_8_Figure_Supplement_1.pdf]

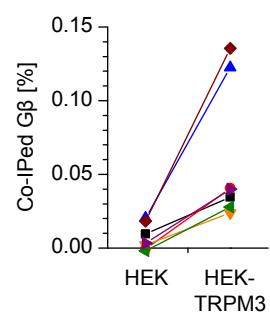

Figure 8 - figure supplement 3

Supplement: supp [file elife_poa_e26280_Figure_8_Figure_Supplement_3.pdf › elife_poa_e26280_Figure_8_Figure_Supplement_3.pdf]

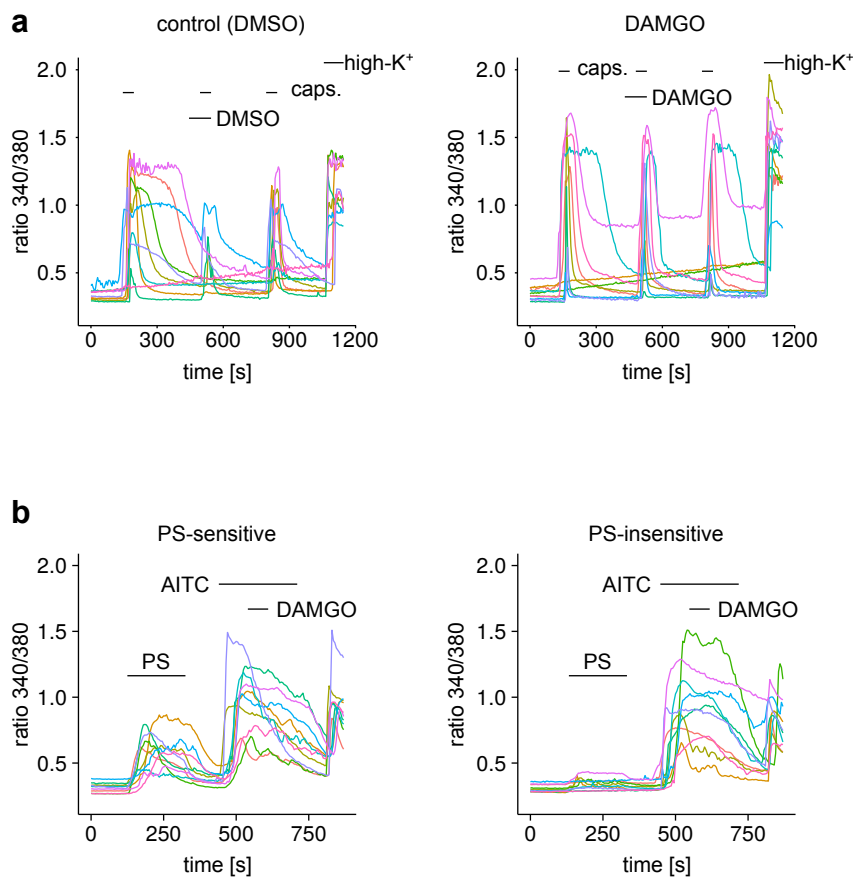

Figure 4 - figure supplement 2

Supplement: supp [file elife_poa_e26280_Fiure_4_Figure_Supplement_2.pdf › elife_poa_e26280_Fiure_4_Figure_Supplement_2.pdf]
